# Supplementary material for: Autonomously Replicating Linear Plasmids That Facilitate the Analysis of Replication Origin Function in Candida albicans
Source: PubMed Central journal article supplement (PMC6403455; doi:10.1128/msphere.00103-19), 2019-03-06

Figure S1

(A)

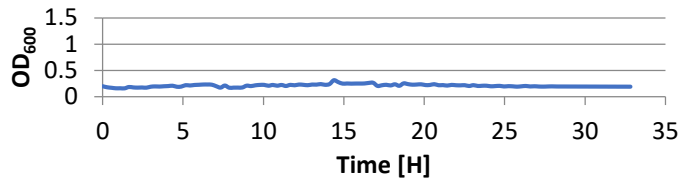

(B)

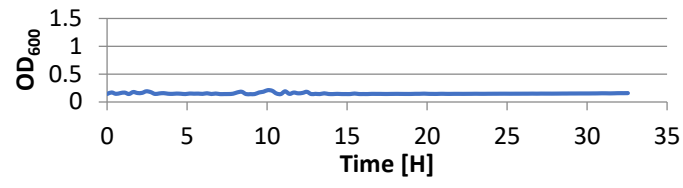

(C)

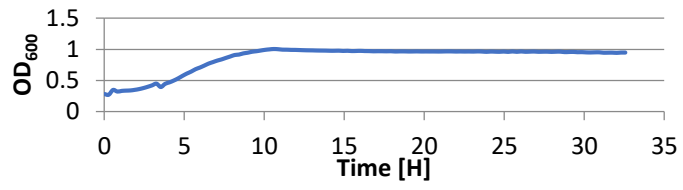

(D)

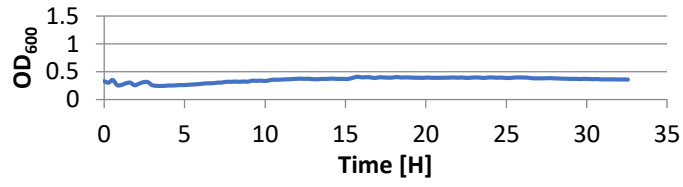

(E)

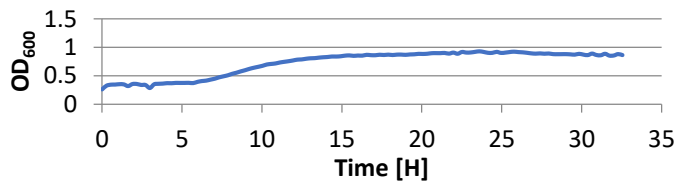

(F)

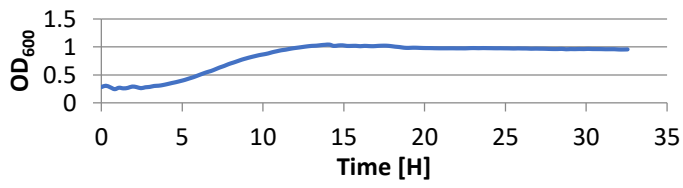

Supplement: mSphere.00103-19-sf001.pdf [file mSphere.00103-19-sf001.pdf]
