# Supplementary material for: Autonomously Replicating Linear Plasmids That Facilitate the Analysis of Replication Origin Function in Candida albicans
Source: PubMed Central journal article supplement (PMC6403455; doi:10.1128/msphere.00103-19), 2019-03-06

Figure S3 (A) Integration of circular plasmid

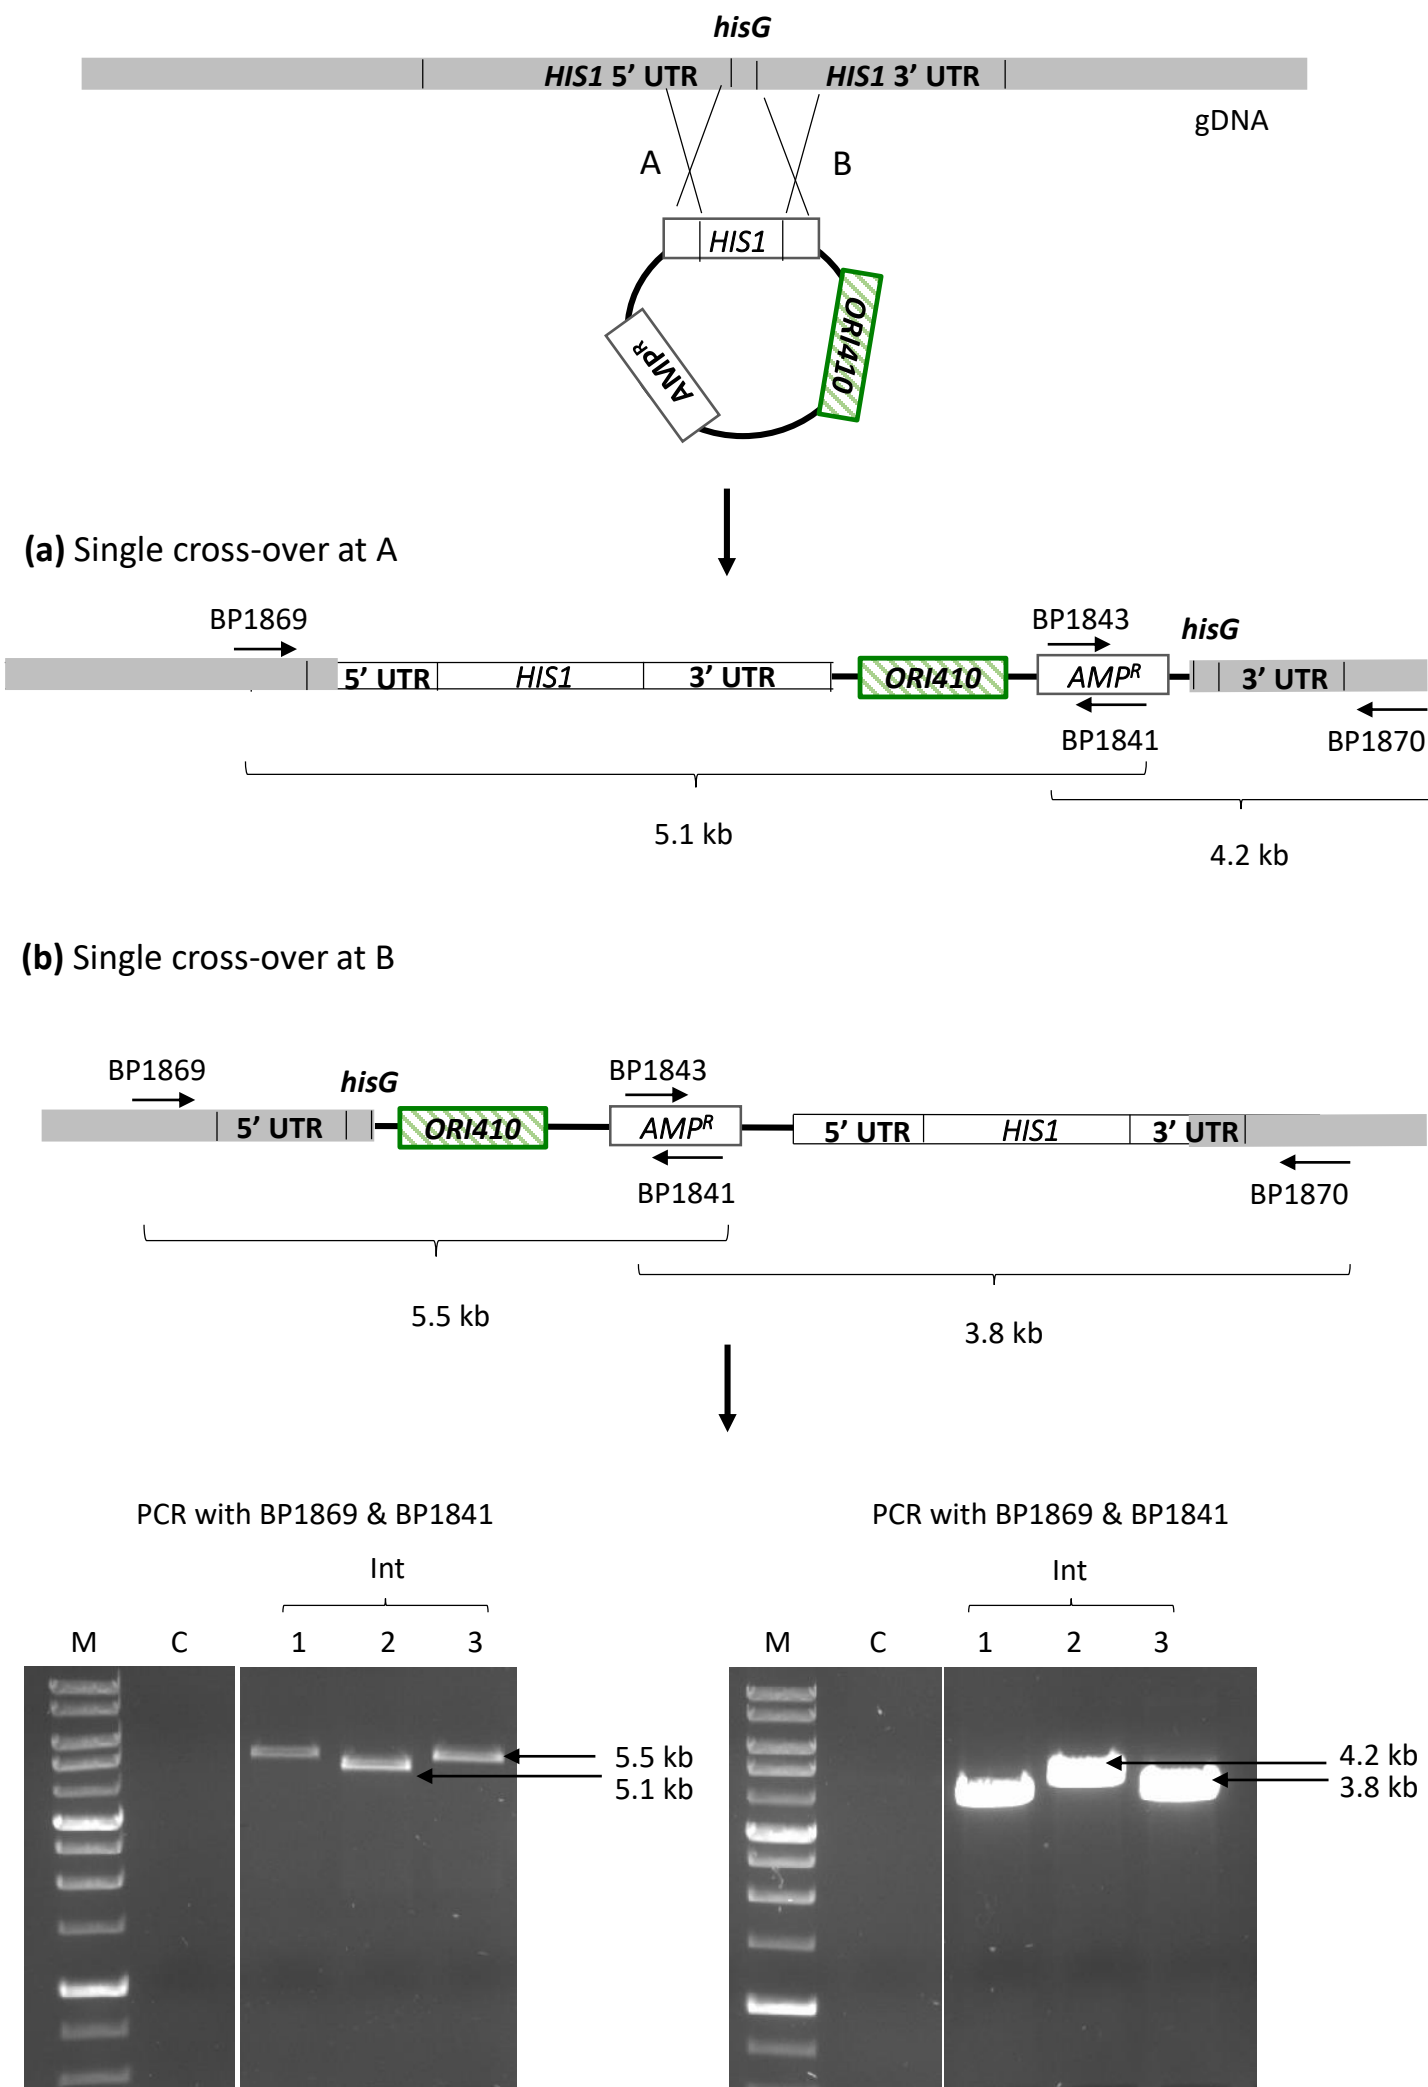

Figure S3 (B) Integration of linear plasmid by double cross-over at *HIS1*

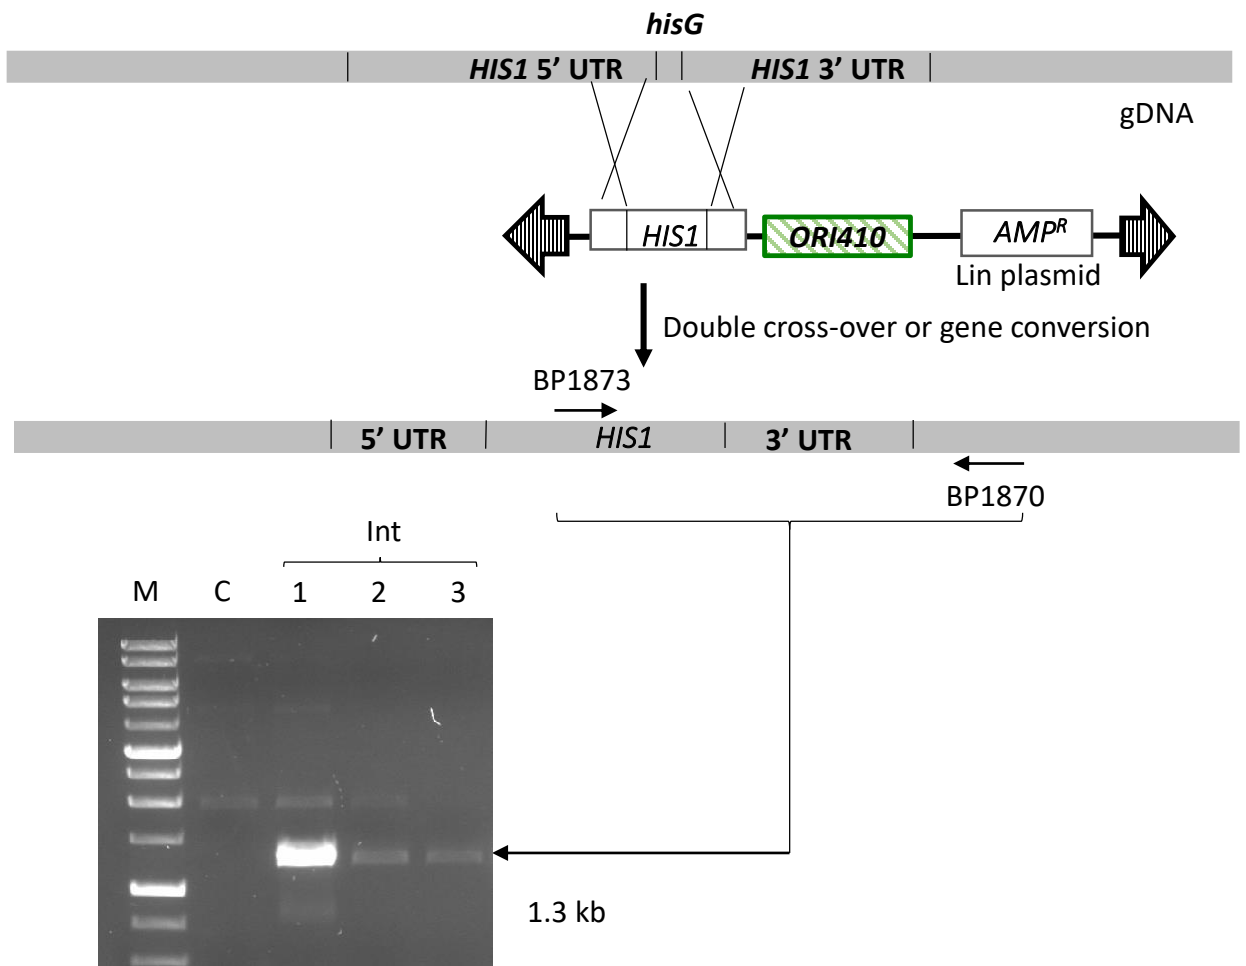

Supplement: mSphere.00103-19-sf003.pdf [file mSphere.00103-19-sf003.pdf]
