# Supplementary material for: Autonomously Replicating Linear Plasmids That Facilitate the Analysis of Replication Origin Function in Candida albicans
Source: PubMed Central journal article supplement (PMC6403455; doi:10.1128/msphere.00103-19), 2019-03-06
Supplement: mSphere.00103-19-st001.pdf [file mSphere.00103-19-st001.pdf]

**Table S1.**

| <b>Strain</b> | <b>Origin</b>  | <b>Transformation efficiency (pCir-CaURA3)</b> |
|---------------|----------------|------------------------------------------------|
|               |                | <b>Tiny</b>                                    |
| <b>BWP17</b>  | No ORI         | 20                                             |
|               | <i>ORI410</i>  | 79                                             |
|               | <i>ORI7-R1</i> | 2                                              |
|               | <i>ORI7-L1</i> | 8                                              |
|               | No DNA         | 0                                              |
| <b>SN76</b>   | No ORI         | 3                                              |
|               | <i>ORI410</i>  | 4                                              |
|               | <i>ORI7-R1</i> | 0                                              |
|               | <i>ORI7-L1</i> | 5                                              |
|               | No DNA         | 0                                              |
