# Supplementary material for: Autonomously Replicating Linear Plasmids That Facilitate the Analysis of Replication Origin Function in Candida albicans
Source: PubMed Central journal article supplement (PMC6403455; doi:10.1128/msphere.00103-19), 2019-03-06
Supplement: mSphere.00103-19-st002.pdf [file mSphere.00103-19-st002.pdf]

**Table S2.**

| <b>pLin-ORI410</b>   | <b>Mitotic stability</b>      |                               |                               |
|----------------------|-------------------------------|-------------------------------|-------------------------------|
| <b>Markers</b>       | <b>1<sup>st</sup> passage</b> | <b>2<sup>nd</sup> passage</b> | <b>3<sup>rd</sup> passage</b> |
| <b><i>CaHIS1</i></b> | 22 ± 14                       | 25.7 ± 12                     | 27.4 ± 9.9                    |
| <b><i>CdARG4</i></b> | 15.7 ± 3                      | 13.8 ± 2                      | 21.6 ± 10                     |
| <b><i>CmLEU2</i></b> | 29.1 ± 7                      | 16.3 ± 1                      | 20.1 ± 11.6                   |
